# Supplementary material for: Exciplex formation between a pair of synthesized AIEgens leads to white light generation: a spectroscopic exploration
Source: Royal Society of Chemistry journal article supplement (doi:10.1039/d0nj02489a), 2020-01-01
Supplement: d0nj02489a1.pdf [file d0nj02489a1.pdf]

## Supporting Information

### **Exciplex Formation between a Pair of Synthesized AIEgens Leads to White Light Generation: A Spectroscopic Exploration**

Arghyadeep Bhattacharyya and Nikhil Guchhait\*

Department of Chemistry, University of Calcutta, 92, A.P.C. Road, Kolkata-700009, India

\*Corresponding author. Tel.: +913323508386; fax: +913323519755.

E-mail address: nguchhait@yahoo.com (N. Guchhait).

### Contents

- 1. Characterization of BIMP**
- 2. Characterization of ECPA**
- 3. ORTEP diagram of BIMP**
- 4. Effect of base on absorption and emission profiles of BIMP**
- 5. Emission profiles of BIMP in various solvents when excited at 300 nm**
- 6. Calculation of quantum yields**
- 7. DLS profiles of BIMP in water and acetonitrile**
- 8. DLS profiles of ECPA in water and acetonitrile**
- 9. Overlap of Emission and absorption profiles of BIMP and ECPA**
- 10. Excitation profiles of BIMP-ECPA ensemble**
- 11. CIE Chromacity diagram for BIMP-ECPA mixture**
- 12. References**

## 1. Characterization of BIMP

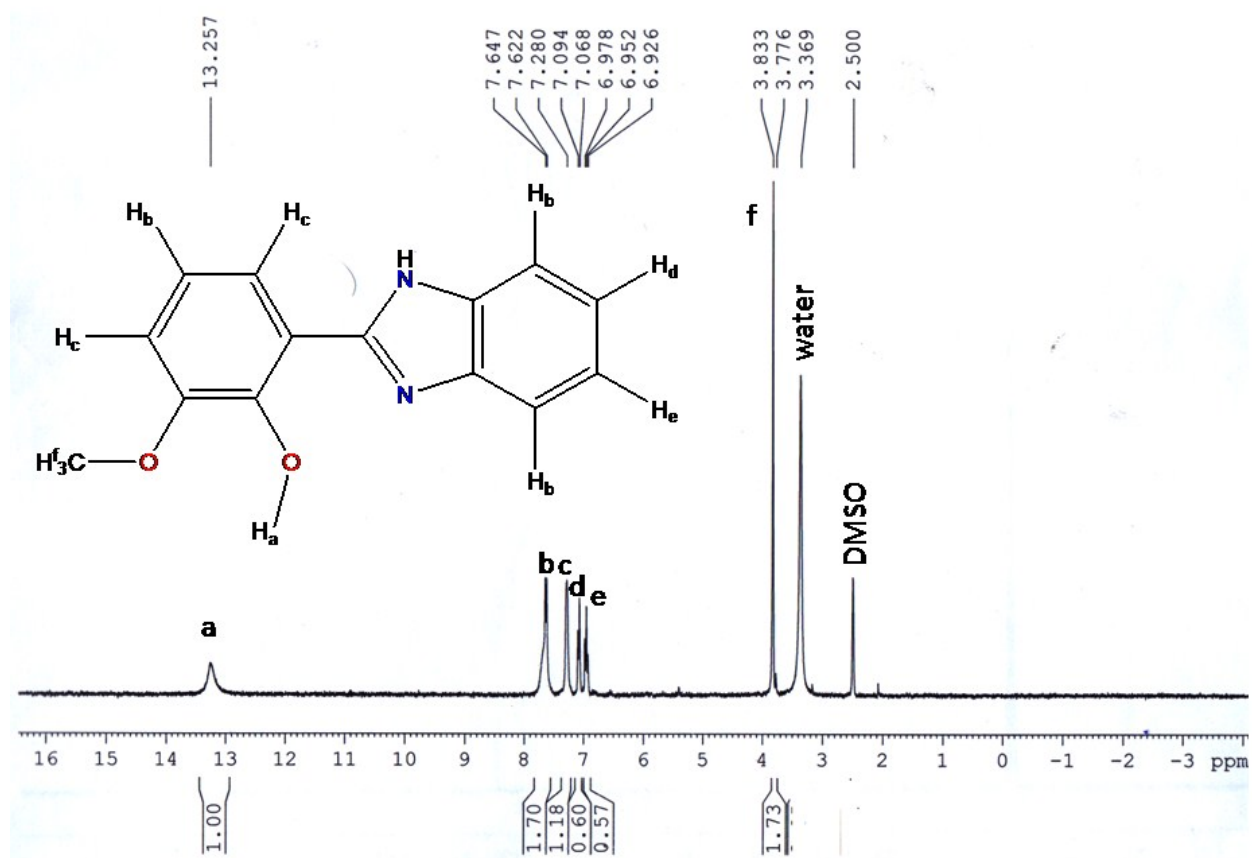

Fig. S1  $^1\text{H}$  NMR spectrum of **BIMP** in  $\text{DMSO-d}_6$ .

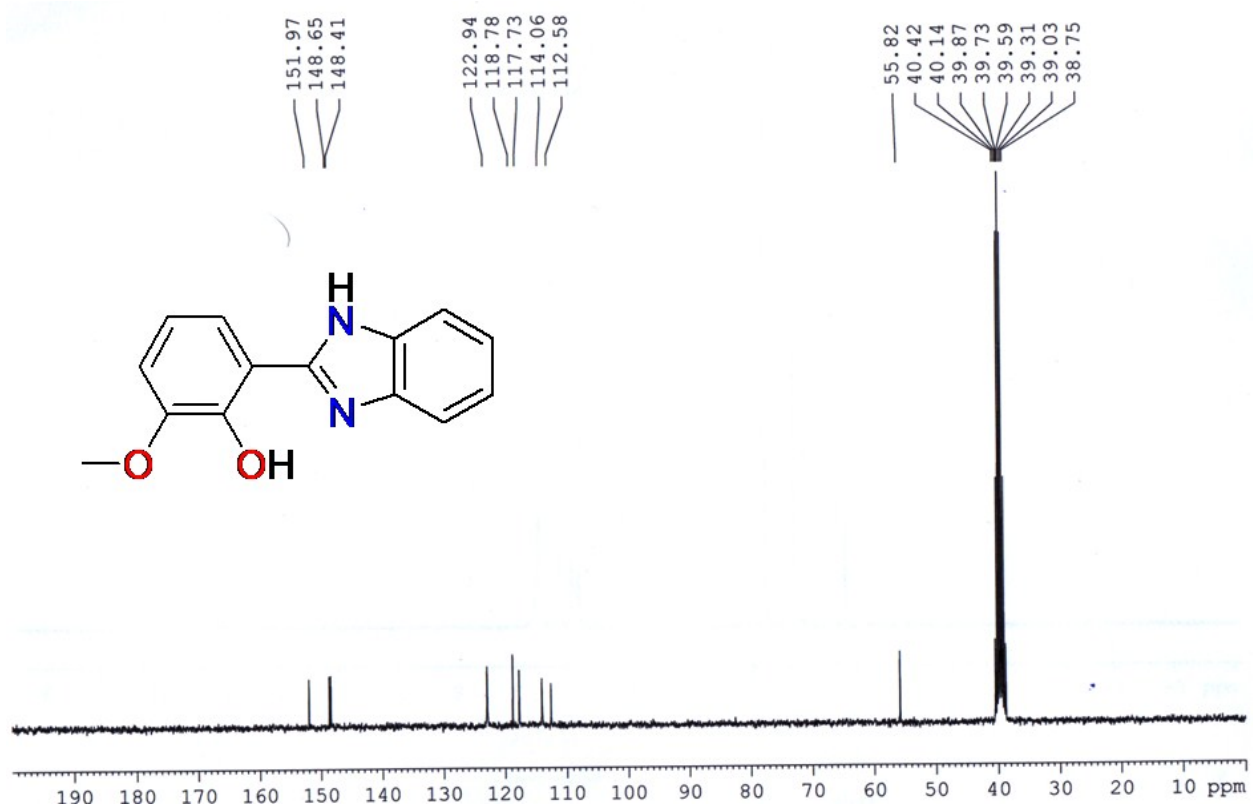

**Fig. S2**  $^{13}\text{C}$  NMR spectrum of **BIMP** in  $\text{DMSO-d}_6$ .

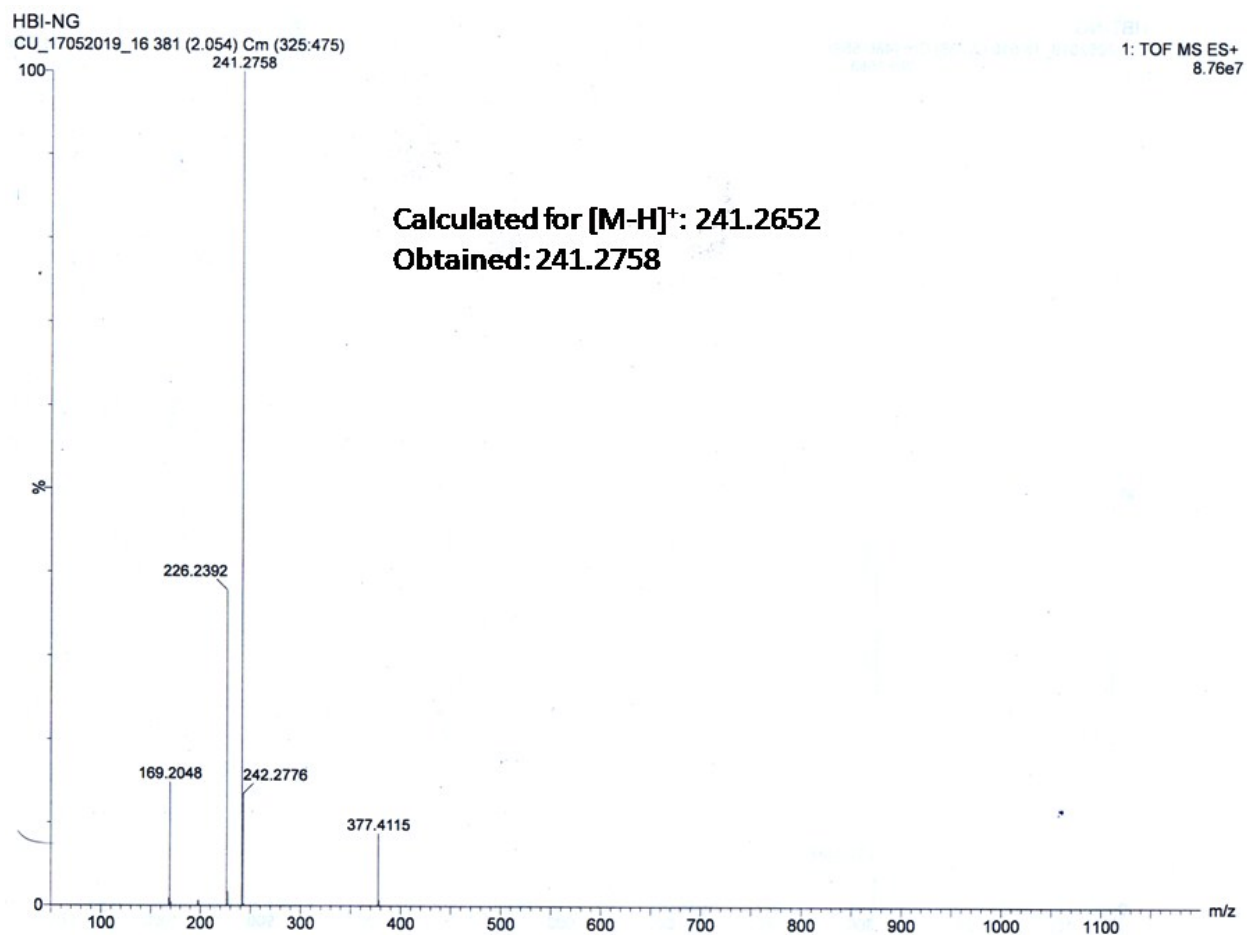

**Fig. S3** ESI-MS profile of **BIMP**.

## 2. Characterization of ECPA

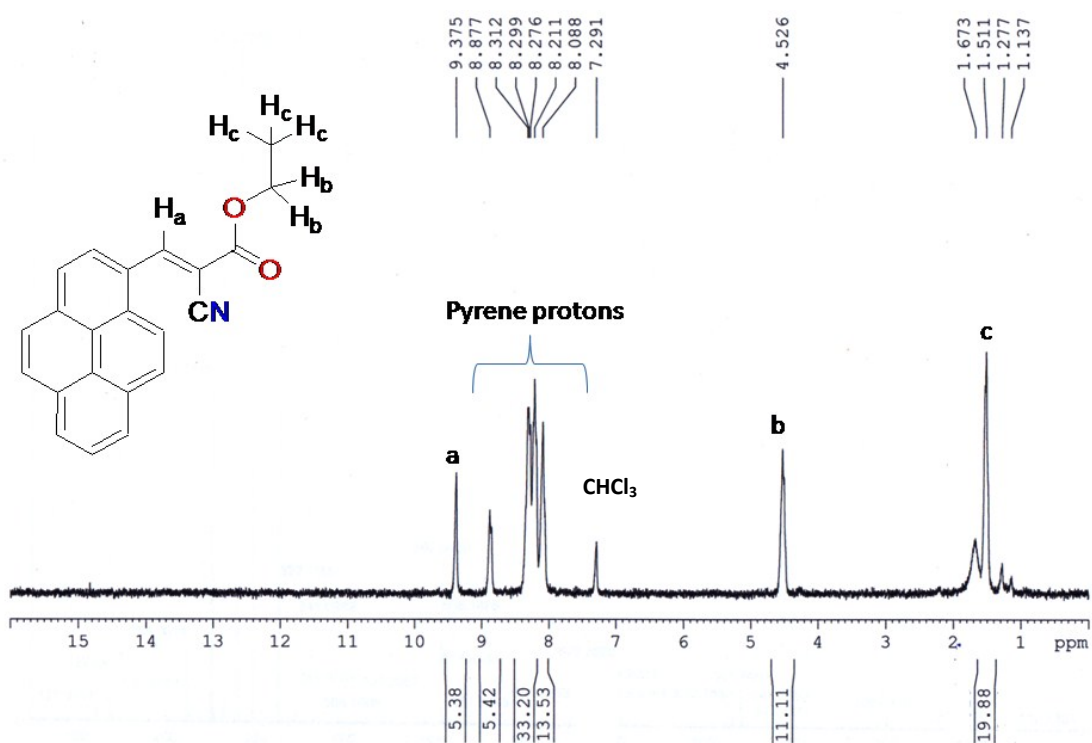

Fig. S4  $^1\text{H}$  NMR spectrum of ECPA in  $\text{CDCl}_3$ .

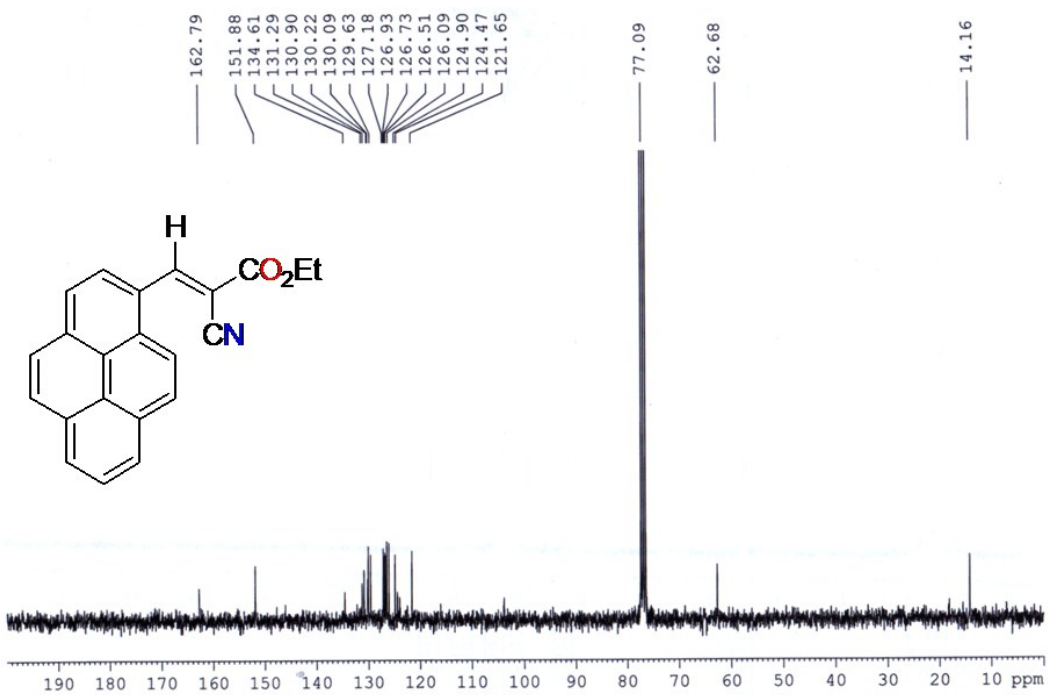

Fig. S5  $^{13}\text{C}$  NMR spectrum of ECPA.

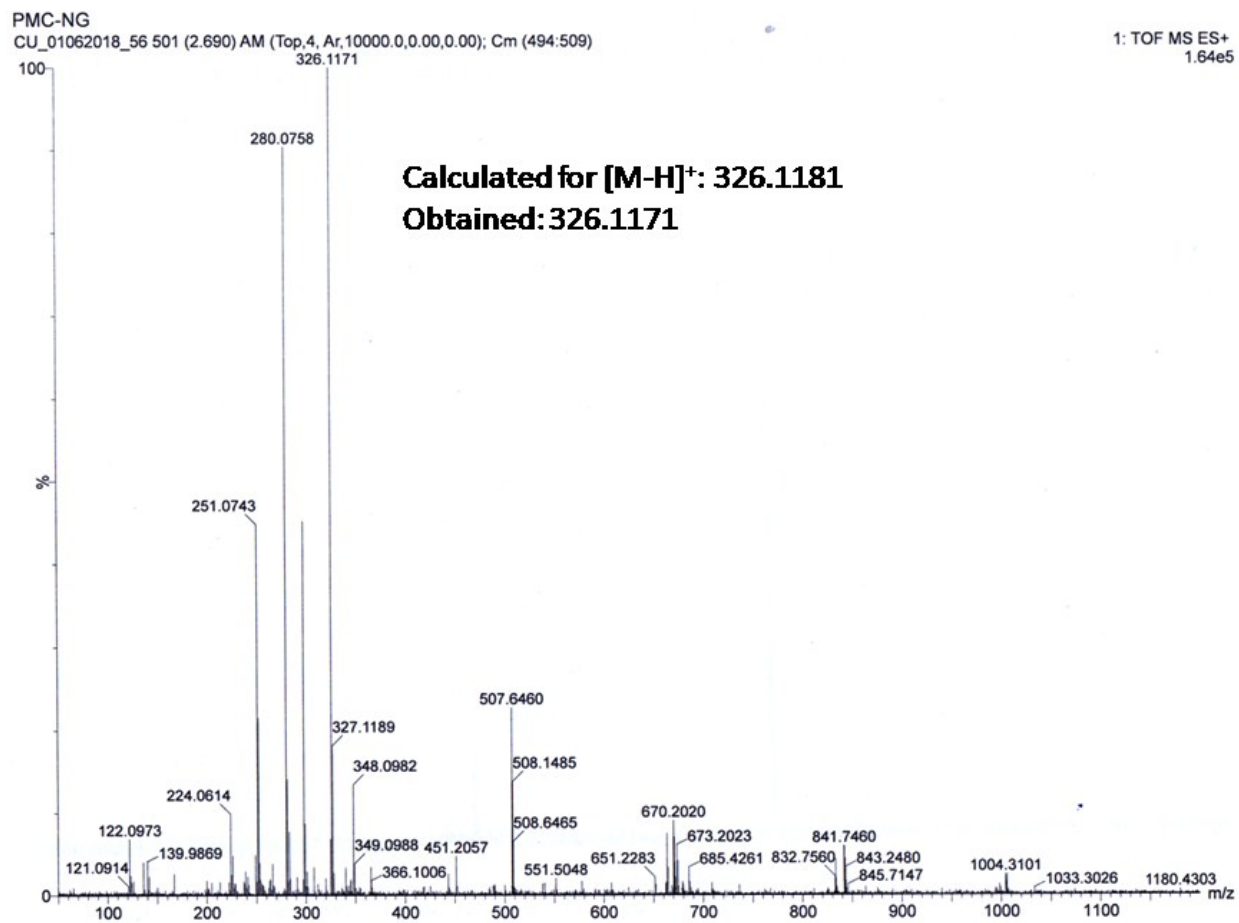

Fig. S6 ESIMS profile of ECPA.

### 3. ORTEP diagram of BIMP

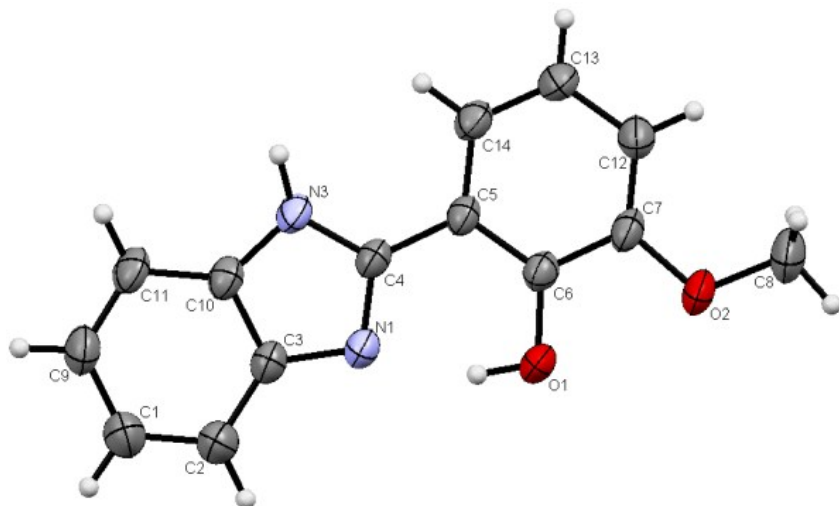

**Fig. S7** ORTEP diagram of **BIMP** at 50% probability. The Hydrogen atoms are not labeled for clarity.

### 4. Effect of base on absorption and emission profiles of BIMP

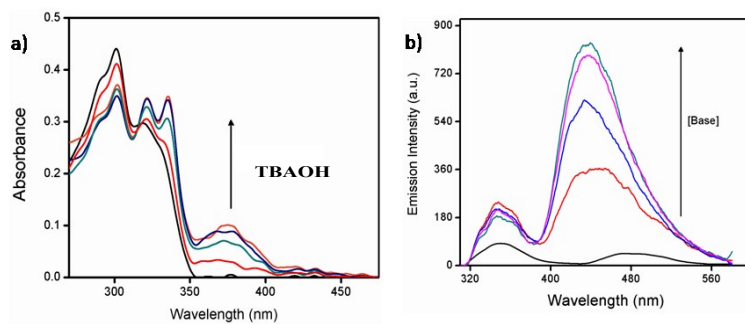

**Fig. S8** Effect of addition of base (0-1  $\mu\text{M}$ ) on the (a) Absorption and (b) Emission profile of **BIMP** in acetonitrile.



### 5. Emission profiles of BIMP in various solvents when excited at 300 nm

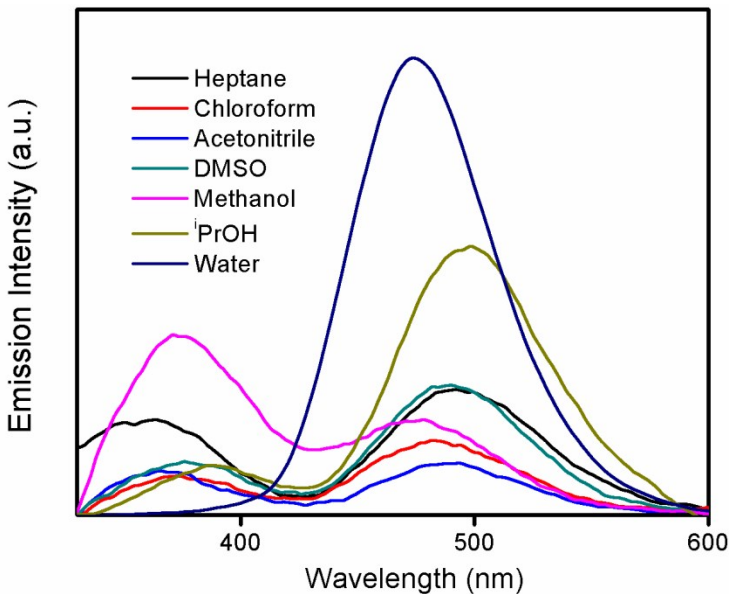

**Fig. S9.** Emission profiles of **BIMP** in various solvents ( $\lambda_{\text{ex}}=300$  nm).

### 6. Calculation of quantum yields

The quantum yields ( $\Phi$ ) of **ECPA** and **BIMP** were calculated using the following equation:

$$\Phi_S = \Phi_R \times \frac{Abs_R}{Abs_S} \times \frac{A_S}{A_R} \times \frac{\eta_S^2}{\eta_R^2},$$

where S denotes sample and R denotes reference. A denotes

the area under the emission spectra and  $\eta$  denotes refractive index. The standards were chosen using standard manual ([Reference S1](#)). For **BIMP**, the standard was chosen to be Anthracene and for **ECPA** it was Coumarin 153.

## 7. DLS profiles of BIMP in water and acetonitrile

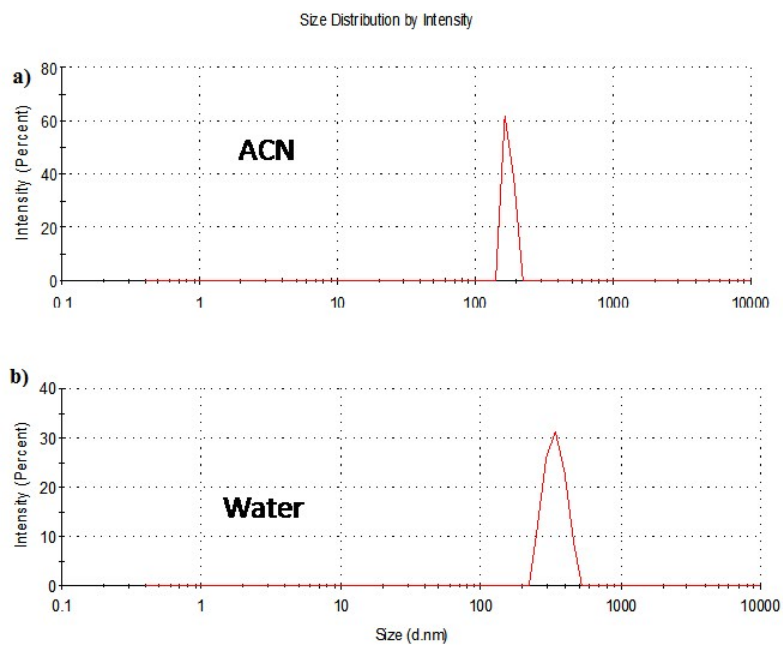

Fig. S10 DLS profiles of **BIMP** in (a) acetonitrile and (b) water.

## 8. DLS profiles of ECPA in water and acetonitrile

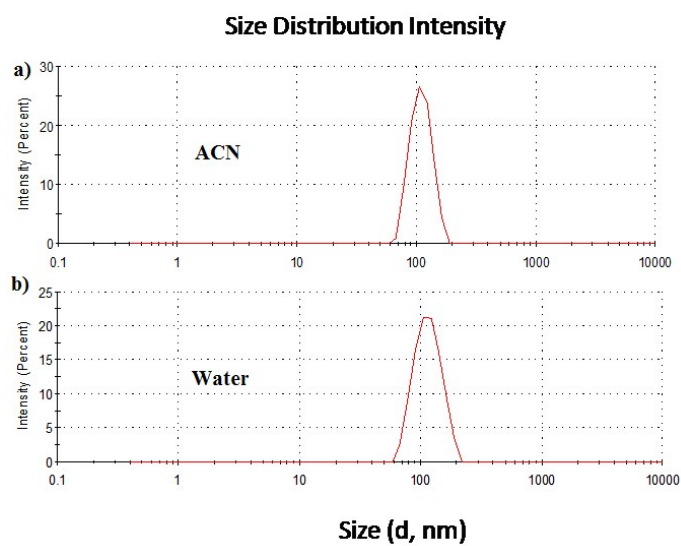

**Fig. S11** DLS profiles of **ECPA** in (a) acetonitrile and (b) water.

### 9. Overlap of Emission and absorption profiles of **BIMP** and **ECPA**

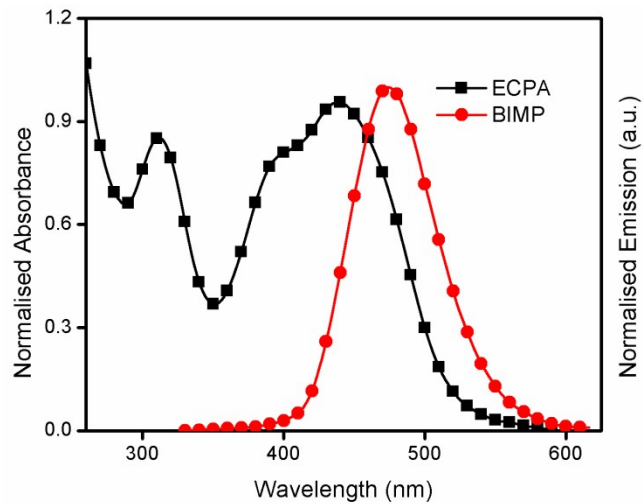

**Fig. S12** Overlap of emission profile of **BIMP** with absorption profile of **ECPA**.

### 10. Excitation profiles of **BIMP-ECPA** ensemble

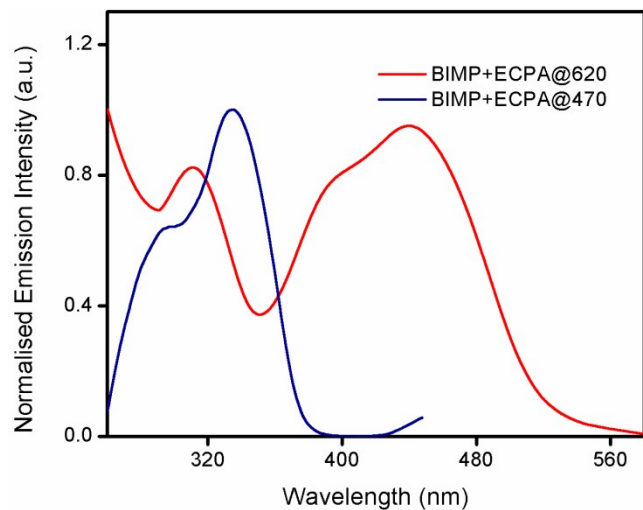

**Fig. S13** Excitation profiles of **BIMP-ECPA** ensemble in water.

## 11. CIE Chromacity diagram for BIMP-ECPA mixture

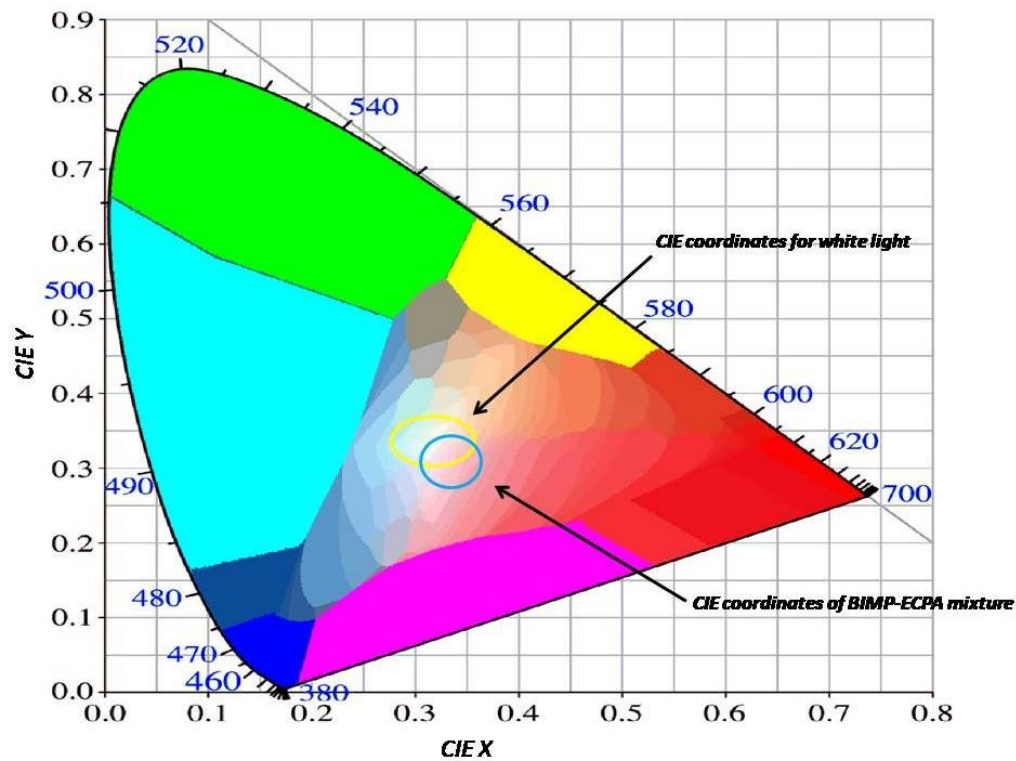

Fig. S14 CIE chromacity diagram of BIMP-ECPA mixture in water ( $\lambda_{\text{ex}}=330$  nm).

## 12. References

S1. A. M. Brouwer, *Pure Appl. Chem.*, 2011, 83, 2213–2228.
